# Supplementary material for: Strong interfacial coupling for NiS thin layer covered CdS nanorods with highly efficient photocatalytic hydrogen production
Source: Royal Society of Chemistry journal article supplement (doi:10.1039/d0nj04335d), 2020-01-01
Supplement: d0nj04335d9.pdf [file d0nj04335d9.pdf]

## Supporting Information

# Strong interfacial coupling for NiS thin layer covered CdS nanorods with highly efficient photocatalytic hydrogen production

Zhaohui Chen<sup>#</sup>, Chuchu Cheng<sup>#</sup>, Fangshu Xing and Caijin Huang<sup>\*</sup>

*State Key Laboratory of Photocatalysis on Energy and Environment, College of Chemistry, Fuzhou University, Fuzhou 350116, PR China.*

<sup>#</sup>Zhaohui Chen and Chuchu Cheng contribute equally to the article and should be considered co-first authors.

*\*To whom correspondence should be addressed, E-mail: cjhuang@fzu.edu.cn;*

## Figures

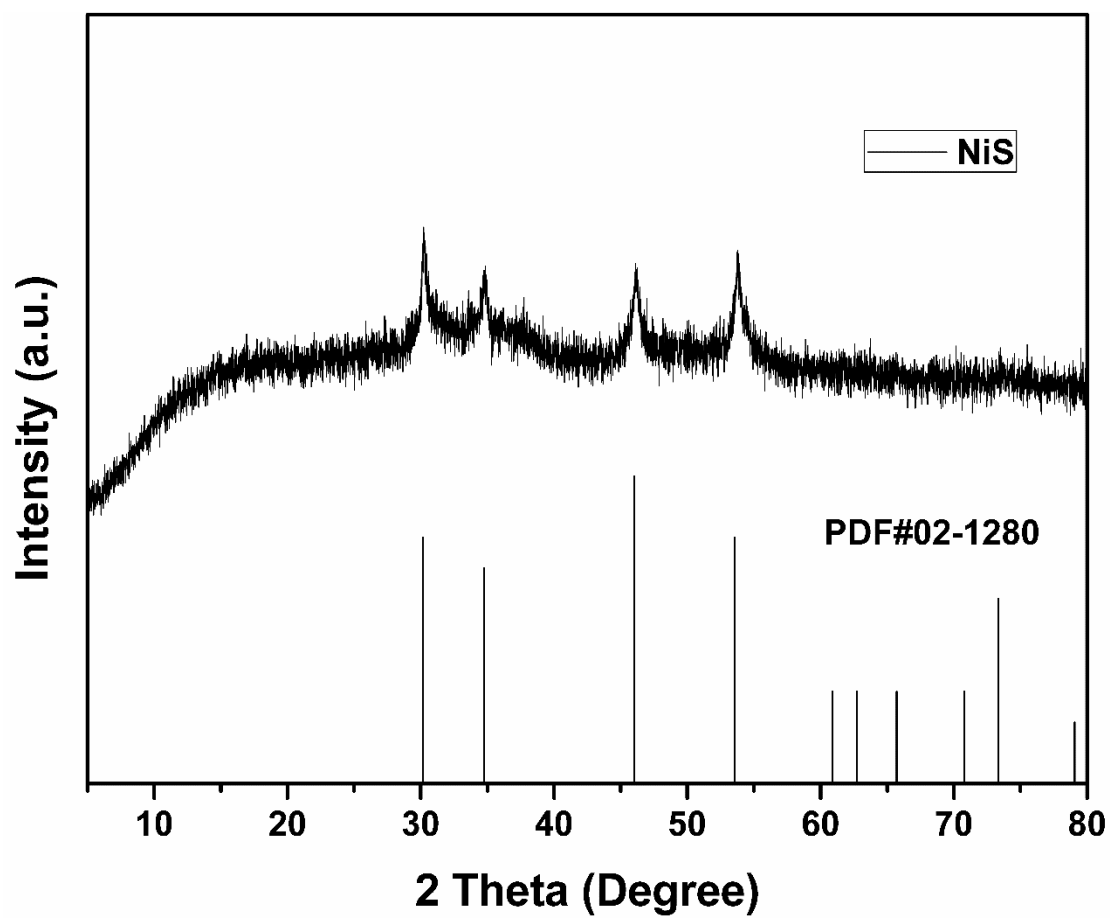

Fig. S1. XRD pattern of pure NiS.

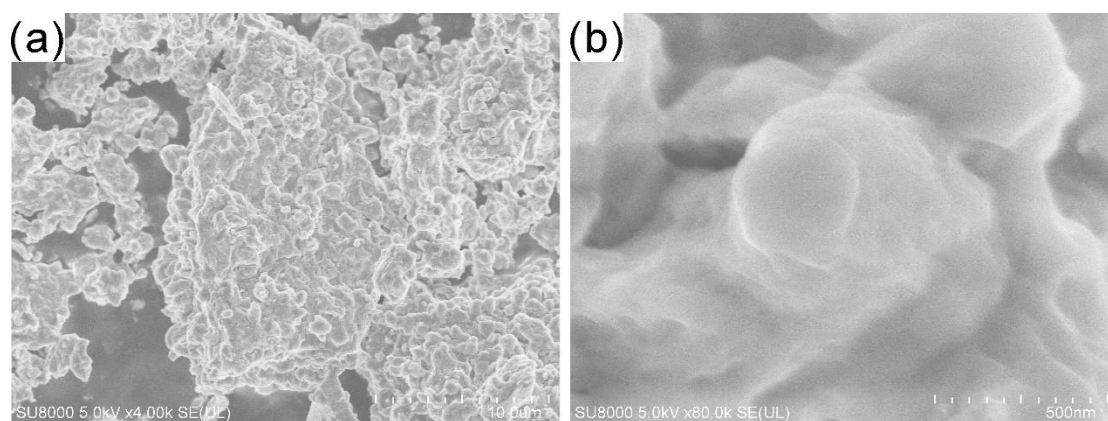

Fig. S2. (a) Low- and (b) high-magnification SEM images of pure NiS.

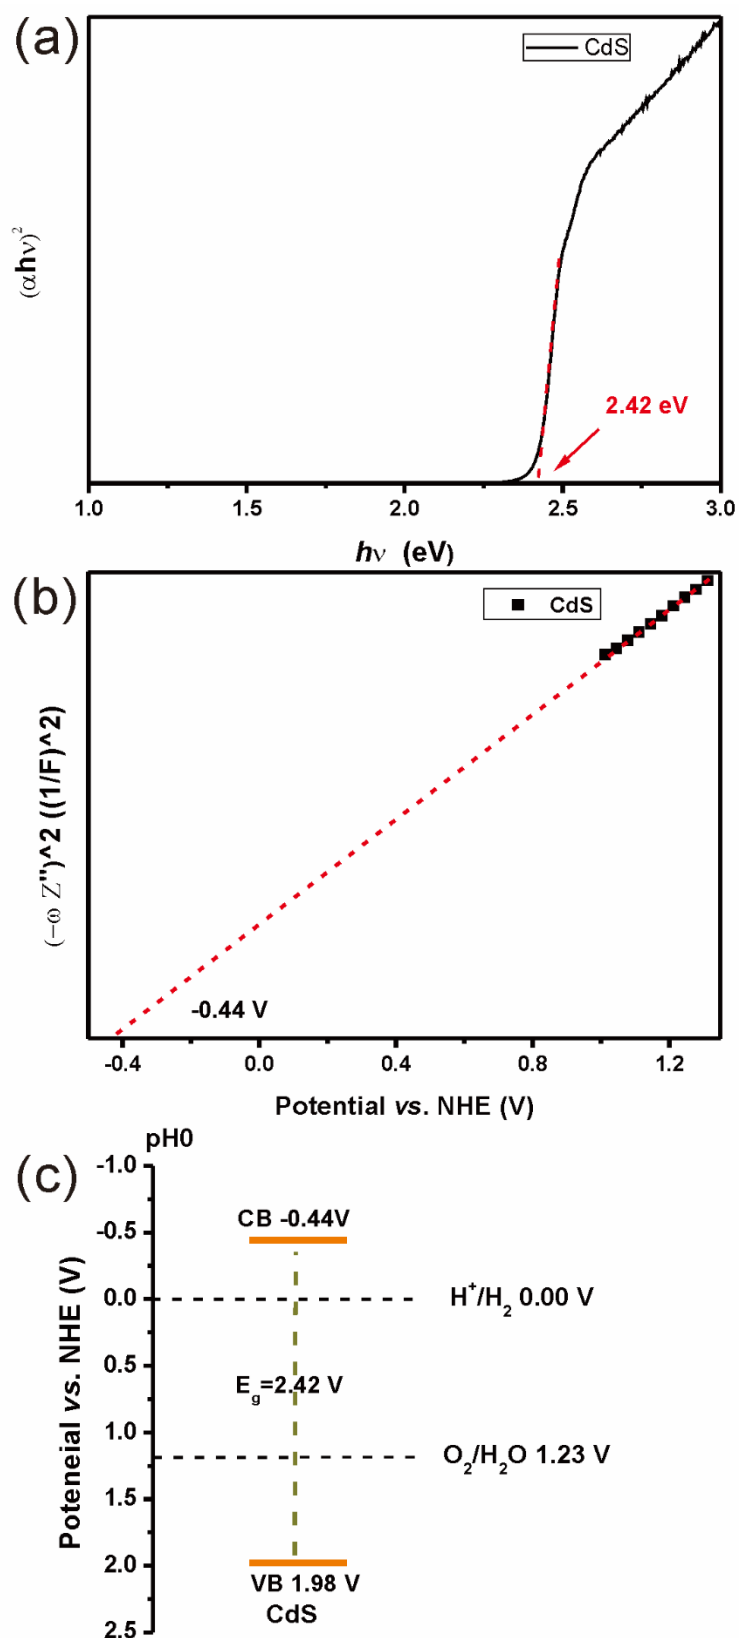

**Fig. S3.** (a) The plot of  $(\alpha h\nu)^2$  versus  $h\nu$  of CdS, (b) Mott-Schottky plots of CdS, (c) Energy band diagram of CdS.

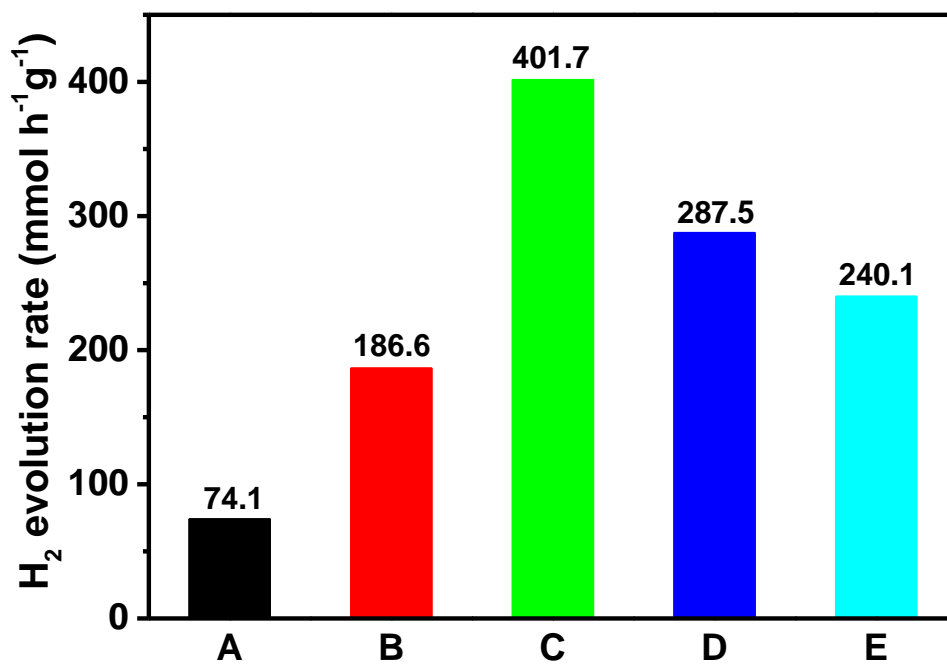

**Fig. S4.** The H<sub>2</sub>-production rate over 25NS-C photocatalyst using different concentrations of hole scavenger under visible light irradiation. (A) 0.25 M Na<sub>2</sub>S, 0.35 M Na<sub>2</sub>SO<sub>3</sub>, (B) 0.50 M Na<sub>2</sub>S, 0.70 M Na<sub>2</sub>SO<sub>3</sub>, (C) 0.75 M Na<sub>2</sub>S, 1.05 M Na<sub>2</sub>SO<sub>3</sub>, (D) 0.875 M Na<sub>2</sub>S, 1.225 M Na<sub>2</sub>SO<sub>3</sub>, (E) 1.0 M Na<sub>2</sub>S, 1.4 M Na<sub>2</sub>SO<sub>3</sub>.

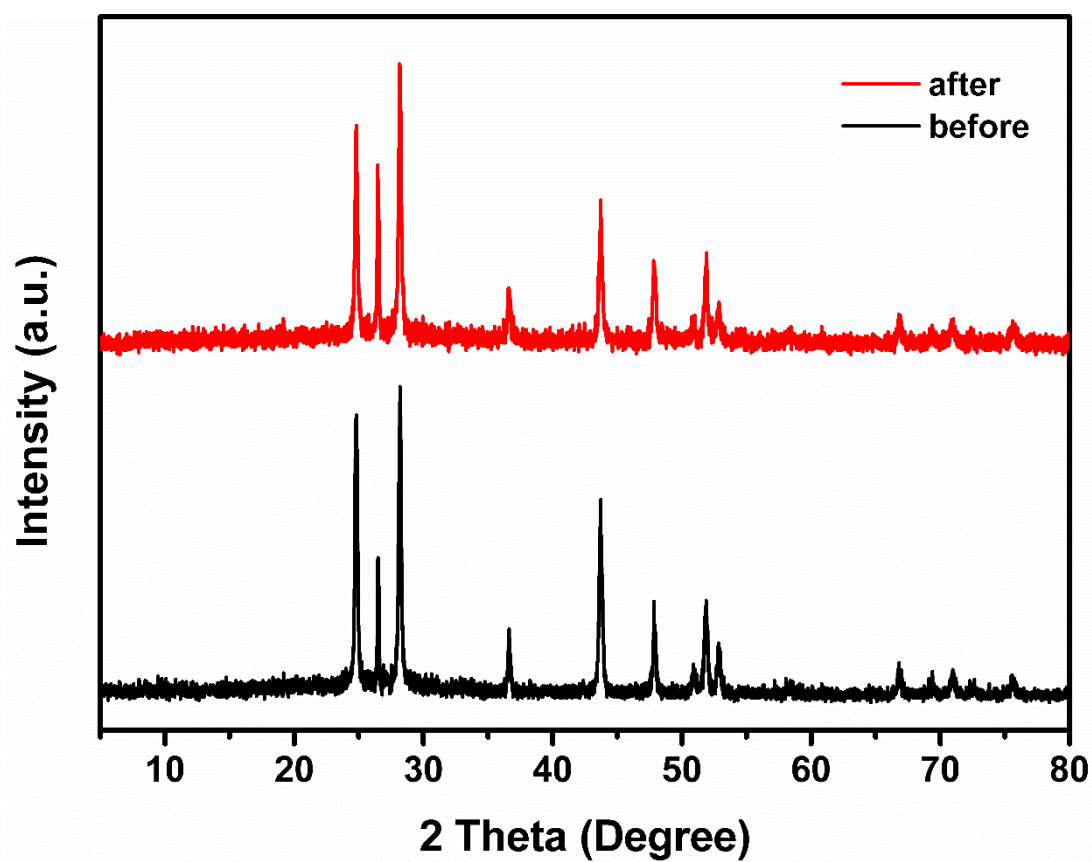

Fig. S5. XRD patterns of 25NS-C before reaction and after 3h of photocatalytic reaction.

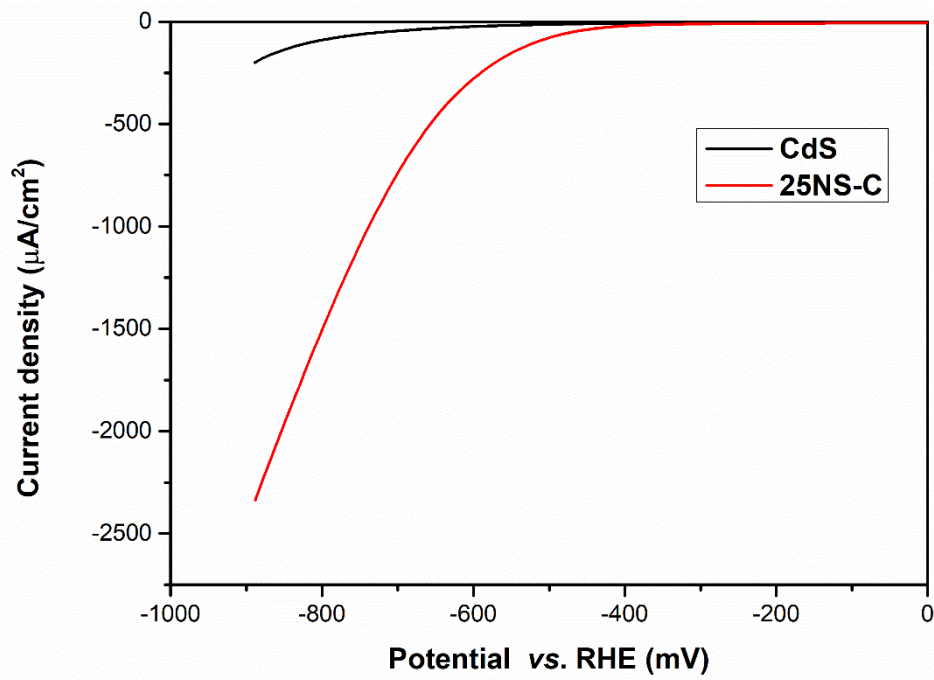

**Fig S6.** The LSV curves of CdS and 25NS-C samples.

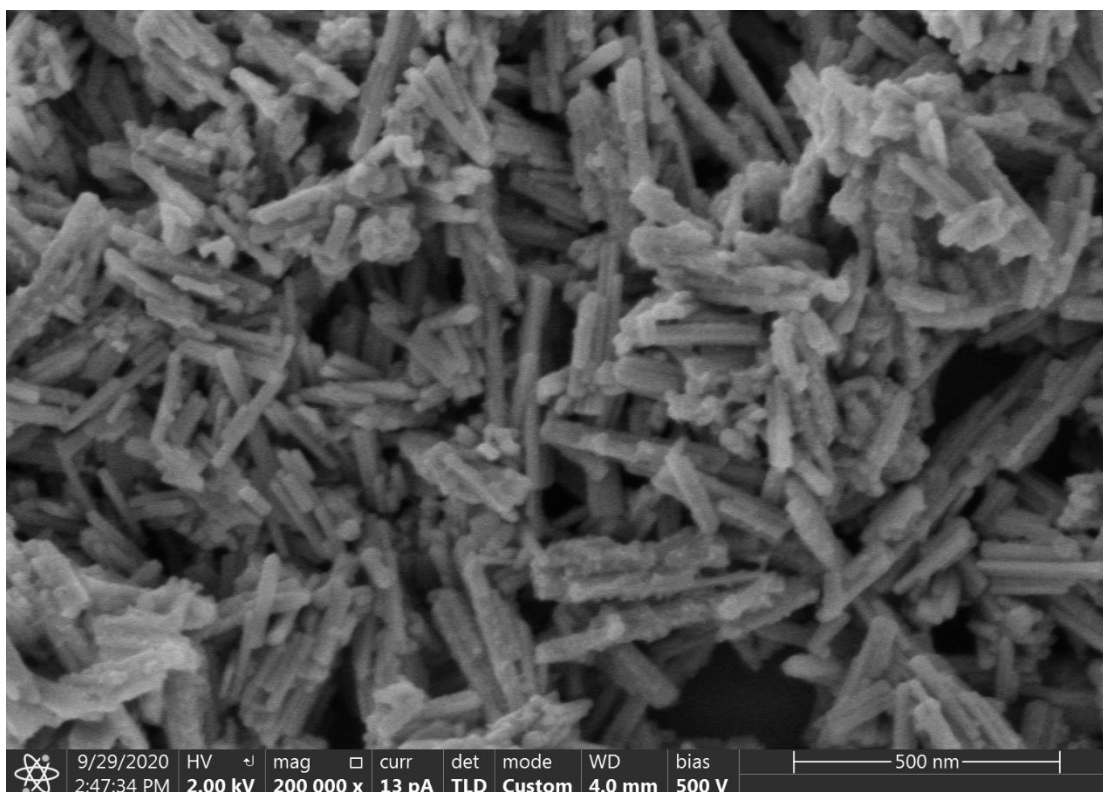

**Fig S7.** The SEM image of 25NS-C after photocatalytic reaction.

**Table S1.** Collected data of H<sub>2</sub>-evolution activity over CdS-based photocatalysts.

| Photocatalyst         | Light source          | Reactant solution                                                   | Activity/<br>mmol·h <sup>-1</sup> ·g <sup>-1</sup> | References |
|-----------------------|-----------------------|---------------------------------------------------------------------|----------------------------------------------------|------------|
| NiS/CdS               | Xe-Vis<br>(≥420 nm)   | 10 vol.%<br>lactic acid                                             | 49.2                                               | 1          |
| MoS <sub>2</sub> /CdS | Xe-Vis<br>(≥420 nm)   | 10 vol.%<br>lactic acid                                             | 49.8                                               | 2          |
| NiS/CdS               | Xe-Vis<br>(≥420 nm)   | 20 vol.%<br>lactic acid                                             | 30.1                                               | 3          |
| BP-Au-CdS             | UV-vis-NIR            | 0.35M<br>Na <sub>2</sub> S-0.25M<br>Na <sub>2</sub> SO <sub>3</sub> | 10.1                                               | 4          |
| NiS/CdS               | Xe-Vis<br>(≥420 nm)   | 20 vol.%<br>lactic acid                                             | 158.7                                              | 5          |
| Pd@CdS/PdS            | Xe-Vis<br>( > 400 nm) | 0.1M<br>Na <sub>2</sub> S-0.1M<br>Na <sub>2</sub> SO <sub>3</sub>   | 144.8                                              | 6          |
| Ni <sub>2</sub> P/CdS | Xe-Vis<br>(≥420 nm)   | 0.35M<br>Na <sub>2</sub> S-0.25M<br>Na <sub>2</sub> SO <sub>3</sub> | 34.9                                               | 7          |

|                          |                                 |                                                                     |                                             |           |
|--------------------------|---------------------------------|---------------------------------------------------------------------|---------------------------------------------|-----------|
| Ni(OH) <sub>2</sub> /CdS | Xe-Vis<br>(≥420 nm)             | 10 vol.%<br>ethanol (pH<br>14.7)                                    | 35                                          | 8         |
| Co <sub>2</sub> P/CdS    | Metal halide<br>lamp (sunlight) | 10 vol.%<br>lactic acid                                             | 262.16                                      | 9         |
| Ni/CdS                   | 447 nm laser                    | 10 vol.%<br>ethanol (pH<br>14.7)                                    | 63                                          | 10        |
| Ni <sub>2</sub> P/CdS    | Xe-Vis<br>(≥420 nm)             | 1.25M<br>Na <sub>2</sub> S-1.75M<br>Na <sub>2</sub> SO <sub>3</sub> | ~1200 μmol·h <sup>-1</sup> ·g <sup>-1</sup> | 11        |
| NiS/CdS                  | Xe-Vis<br>(≥420 nm)             | 0.75M<br>Na <sub>2</sub> S-1.25M<br>Na <sub>2</sub> SO <sub>3</sub> | 401.7 mmol·h <sup>-1</sup> ·g <sup>-1</sup> | This work |



## References

1. K. He and L. Guo, *International Journal of Hydrogen Energy*, 2017, **42**, 23995-24005.
2. X.-L. Yin, L.-L. Li, W.-J. Jiang, Y. Zhang, X. Zhang, L.-J. Wan and J.-S. Hu, *ACS Applied Materials & Interfaces*, 2016, **8**, 15258-15266.
3. Y. Zhang, Z. Peng, S. Guan and X. Fu, *Applied Catalysis B: Environmental*, 2018, **224**, 1000-1008.
4. X. Cai, L. Mao, S. Yang, K. Han and J. Zhang, *ACS Energy Letters*, 2018, **3**, 932-939.
5. S. Guan, X. Fu, Y. Zhang and Z. Peng, *Chemical Science*, 2018, **9**, 1574-1585.
6. Q. Sun, N. Wang, J. Yu and J. C. Yu, *Advanced Materials*, 2018, **30**, 1804368.
7. J. Wang, P. Wang, J. Hou, J. Qian, C. Wang and Y. Ao, *Catalysis Science & Technology*, 2018, **8**, 5406-5415.
8. I. Vamvasakis, I. T. Papadas, T. Tzanoudakis, C. Drivas, S. A. Choulis, S. Kennou and G. S. Armatas, *ACS Catalysis*, 2018, **8**, 8726-8738.
9. N. Li, Y. Ding, J. Wu, Z. Zhao, X. Li, Y.-Z. Zheng, M. Huang and X. Tao, *ACS Applied Materials & Interfaces*, 2019, **11**, 22297-22306.
10. T. Simon, N. Bouchonville, M. J. Berr, A. Vaneski, A. Adrović, D. Volbers, R. Wyrwich, M. Döblinger, A. S. Sussha, A. L. Rogach, F. Jäckel, J. K. Stolarczyk and J. Feldmann, *Nature Materials*, 2014, **13**, 1013-1018.
11. Z. Sun, H. Zheng, J. Li and P. Du, *Energy & Environmental Science*, 2015, **8**, 2668-2676.
