# Supplementary figures and images for: Strong interfacial coupling for NiS thin layer covered CdS nanorods with highly efficient photocatalytic hydrogen production
Source: Royal Society of Chemistry journal article supplement (doi:10.1039/d0nj04335d), 2020-01-01

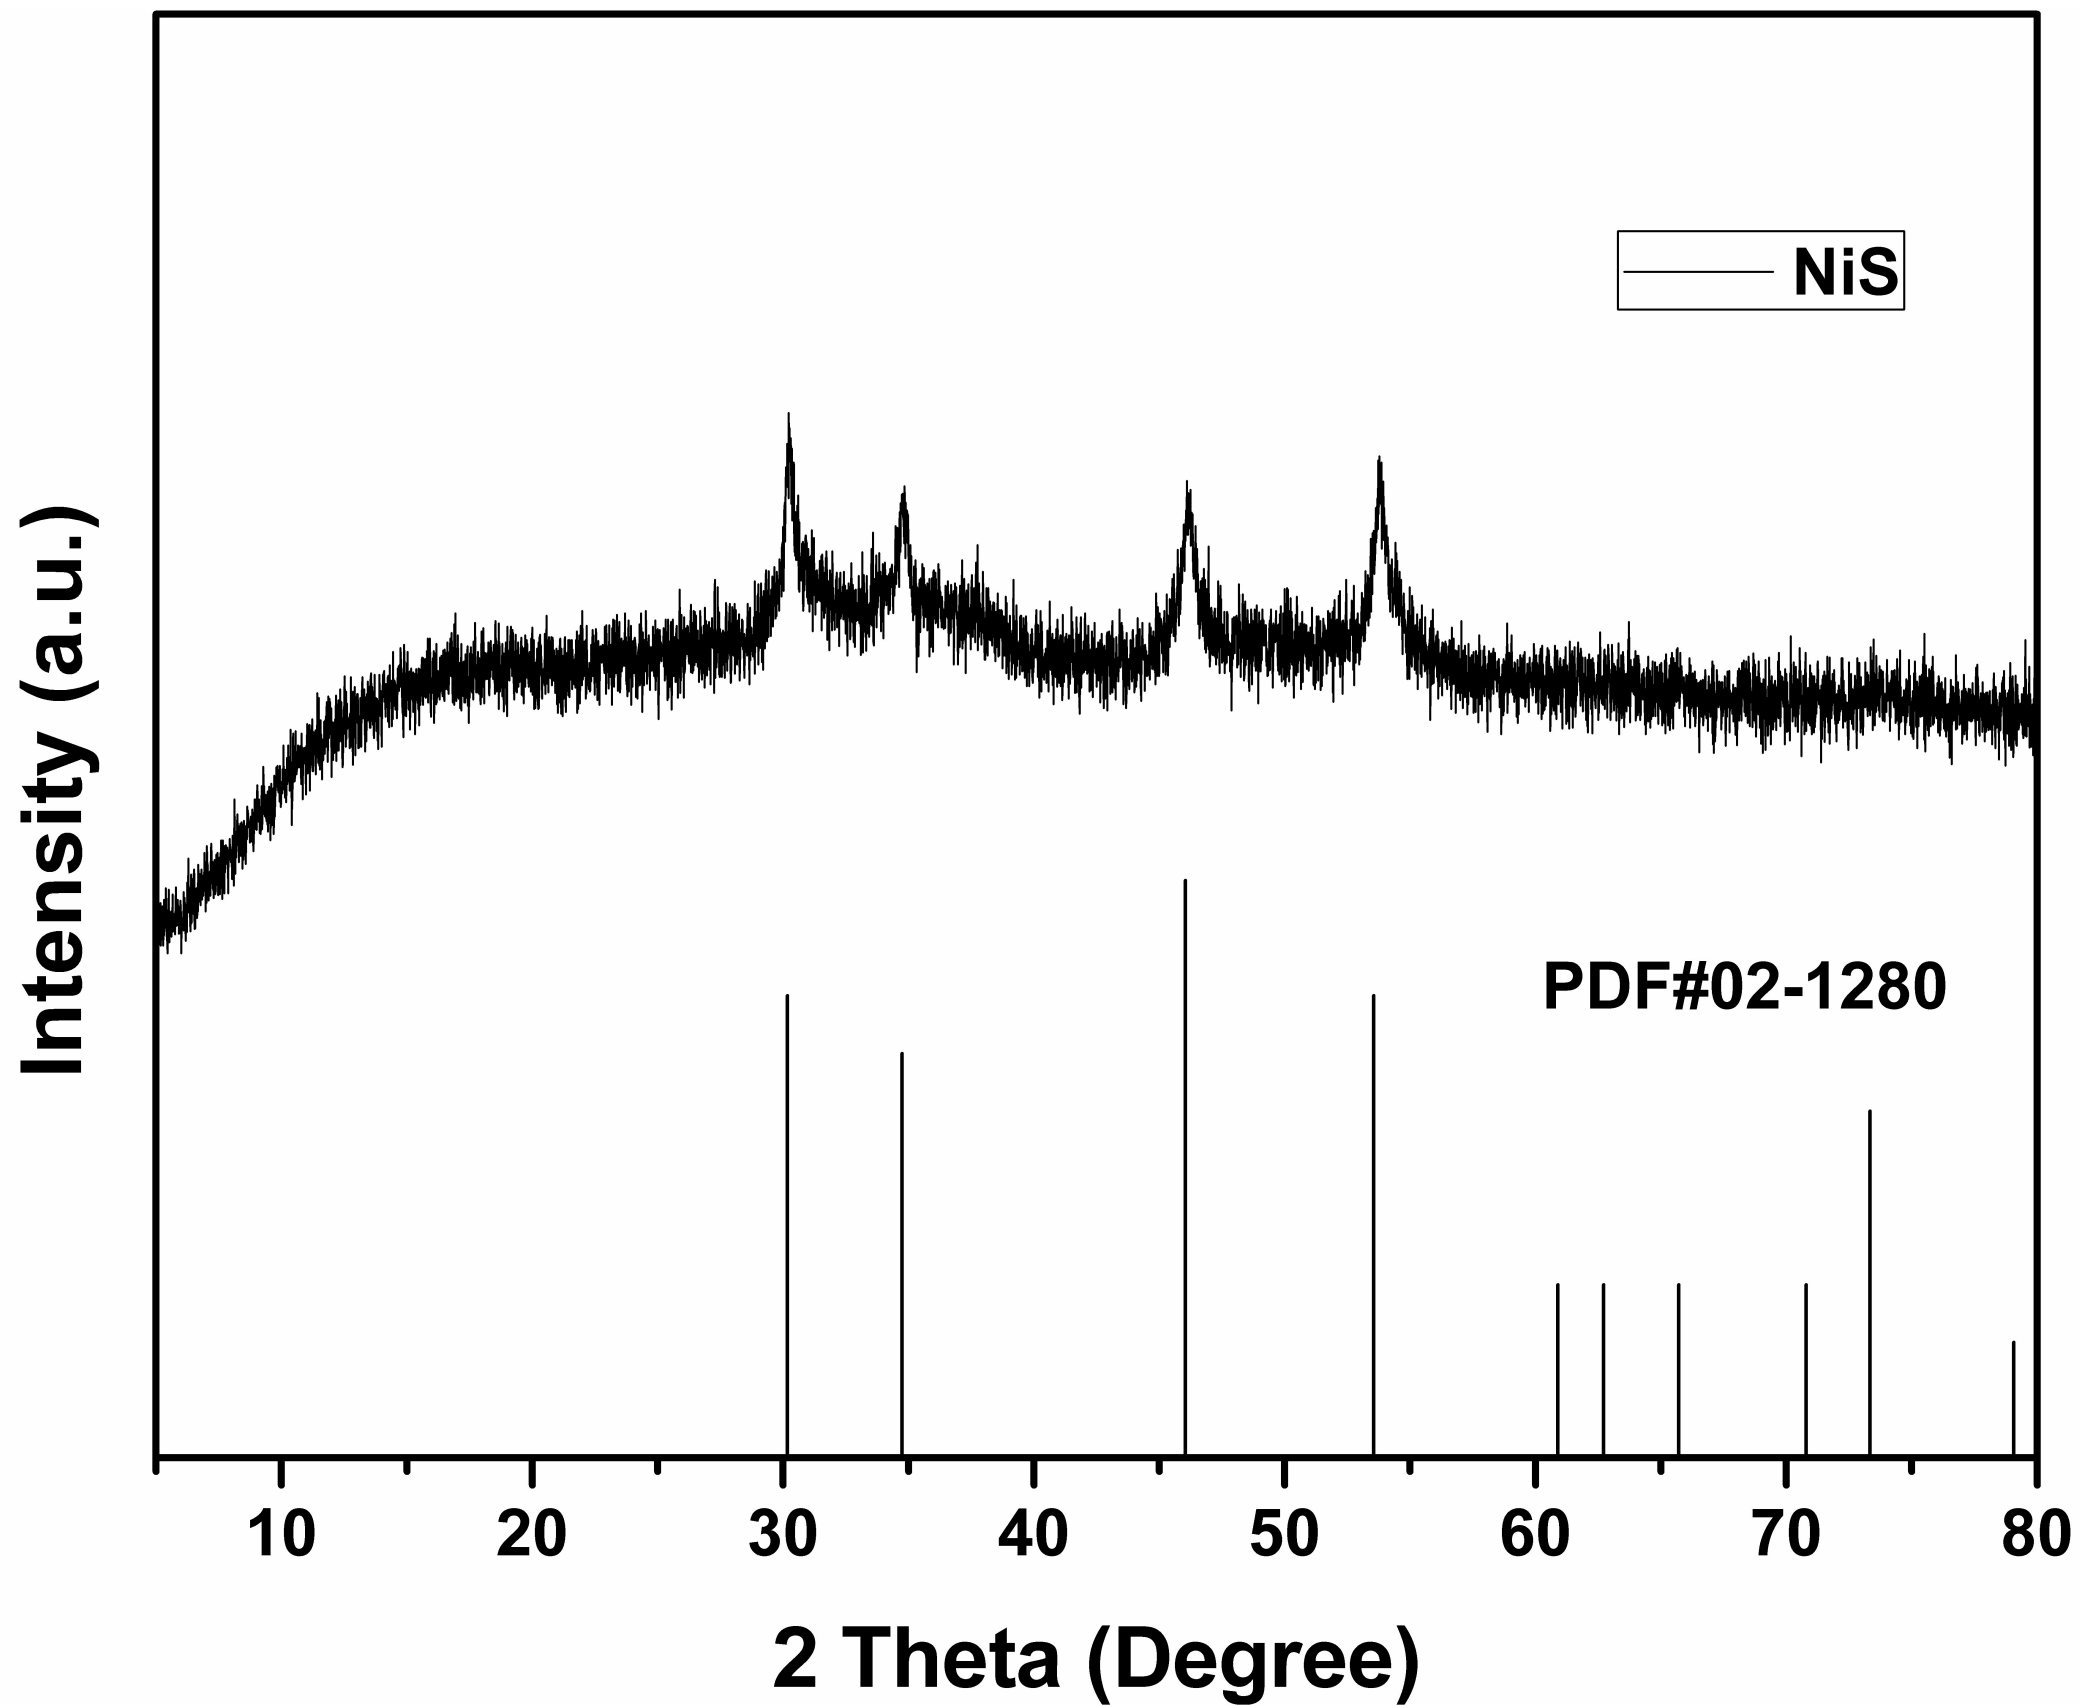

Supplement: d0nj04335d2.pdf [file d0nj04335d2.pdf]

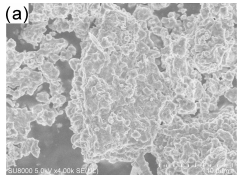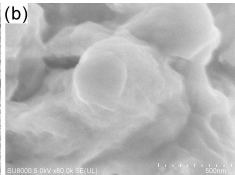

Supplement: d0nj04335d3.pdf [file d0nj04335d3.pdf]

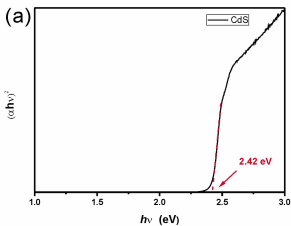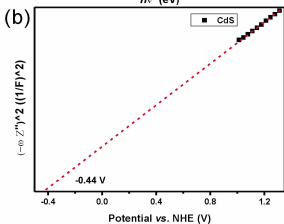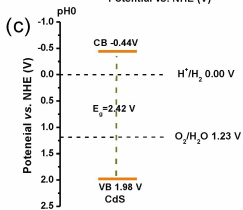

Supplement: d0nj04335d4.pdf [file d0nj04335d4.pdf]

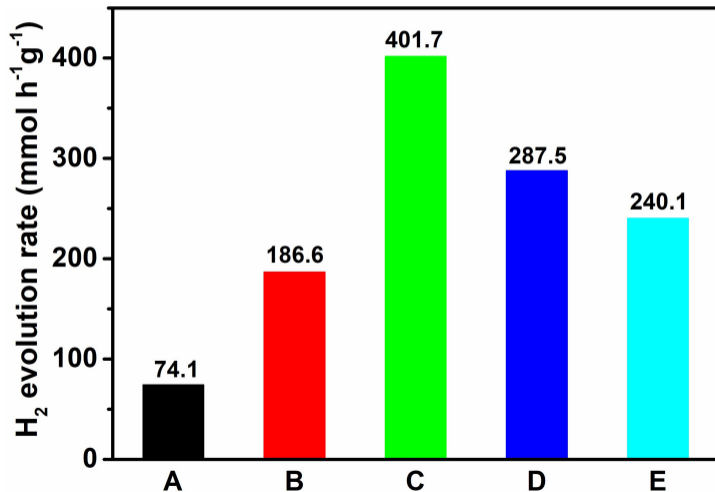

Supplement: d0nj04335d5.pdf [file d0nj04335d5.pdf]

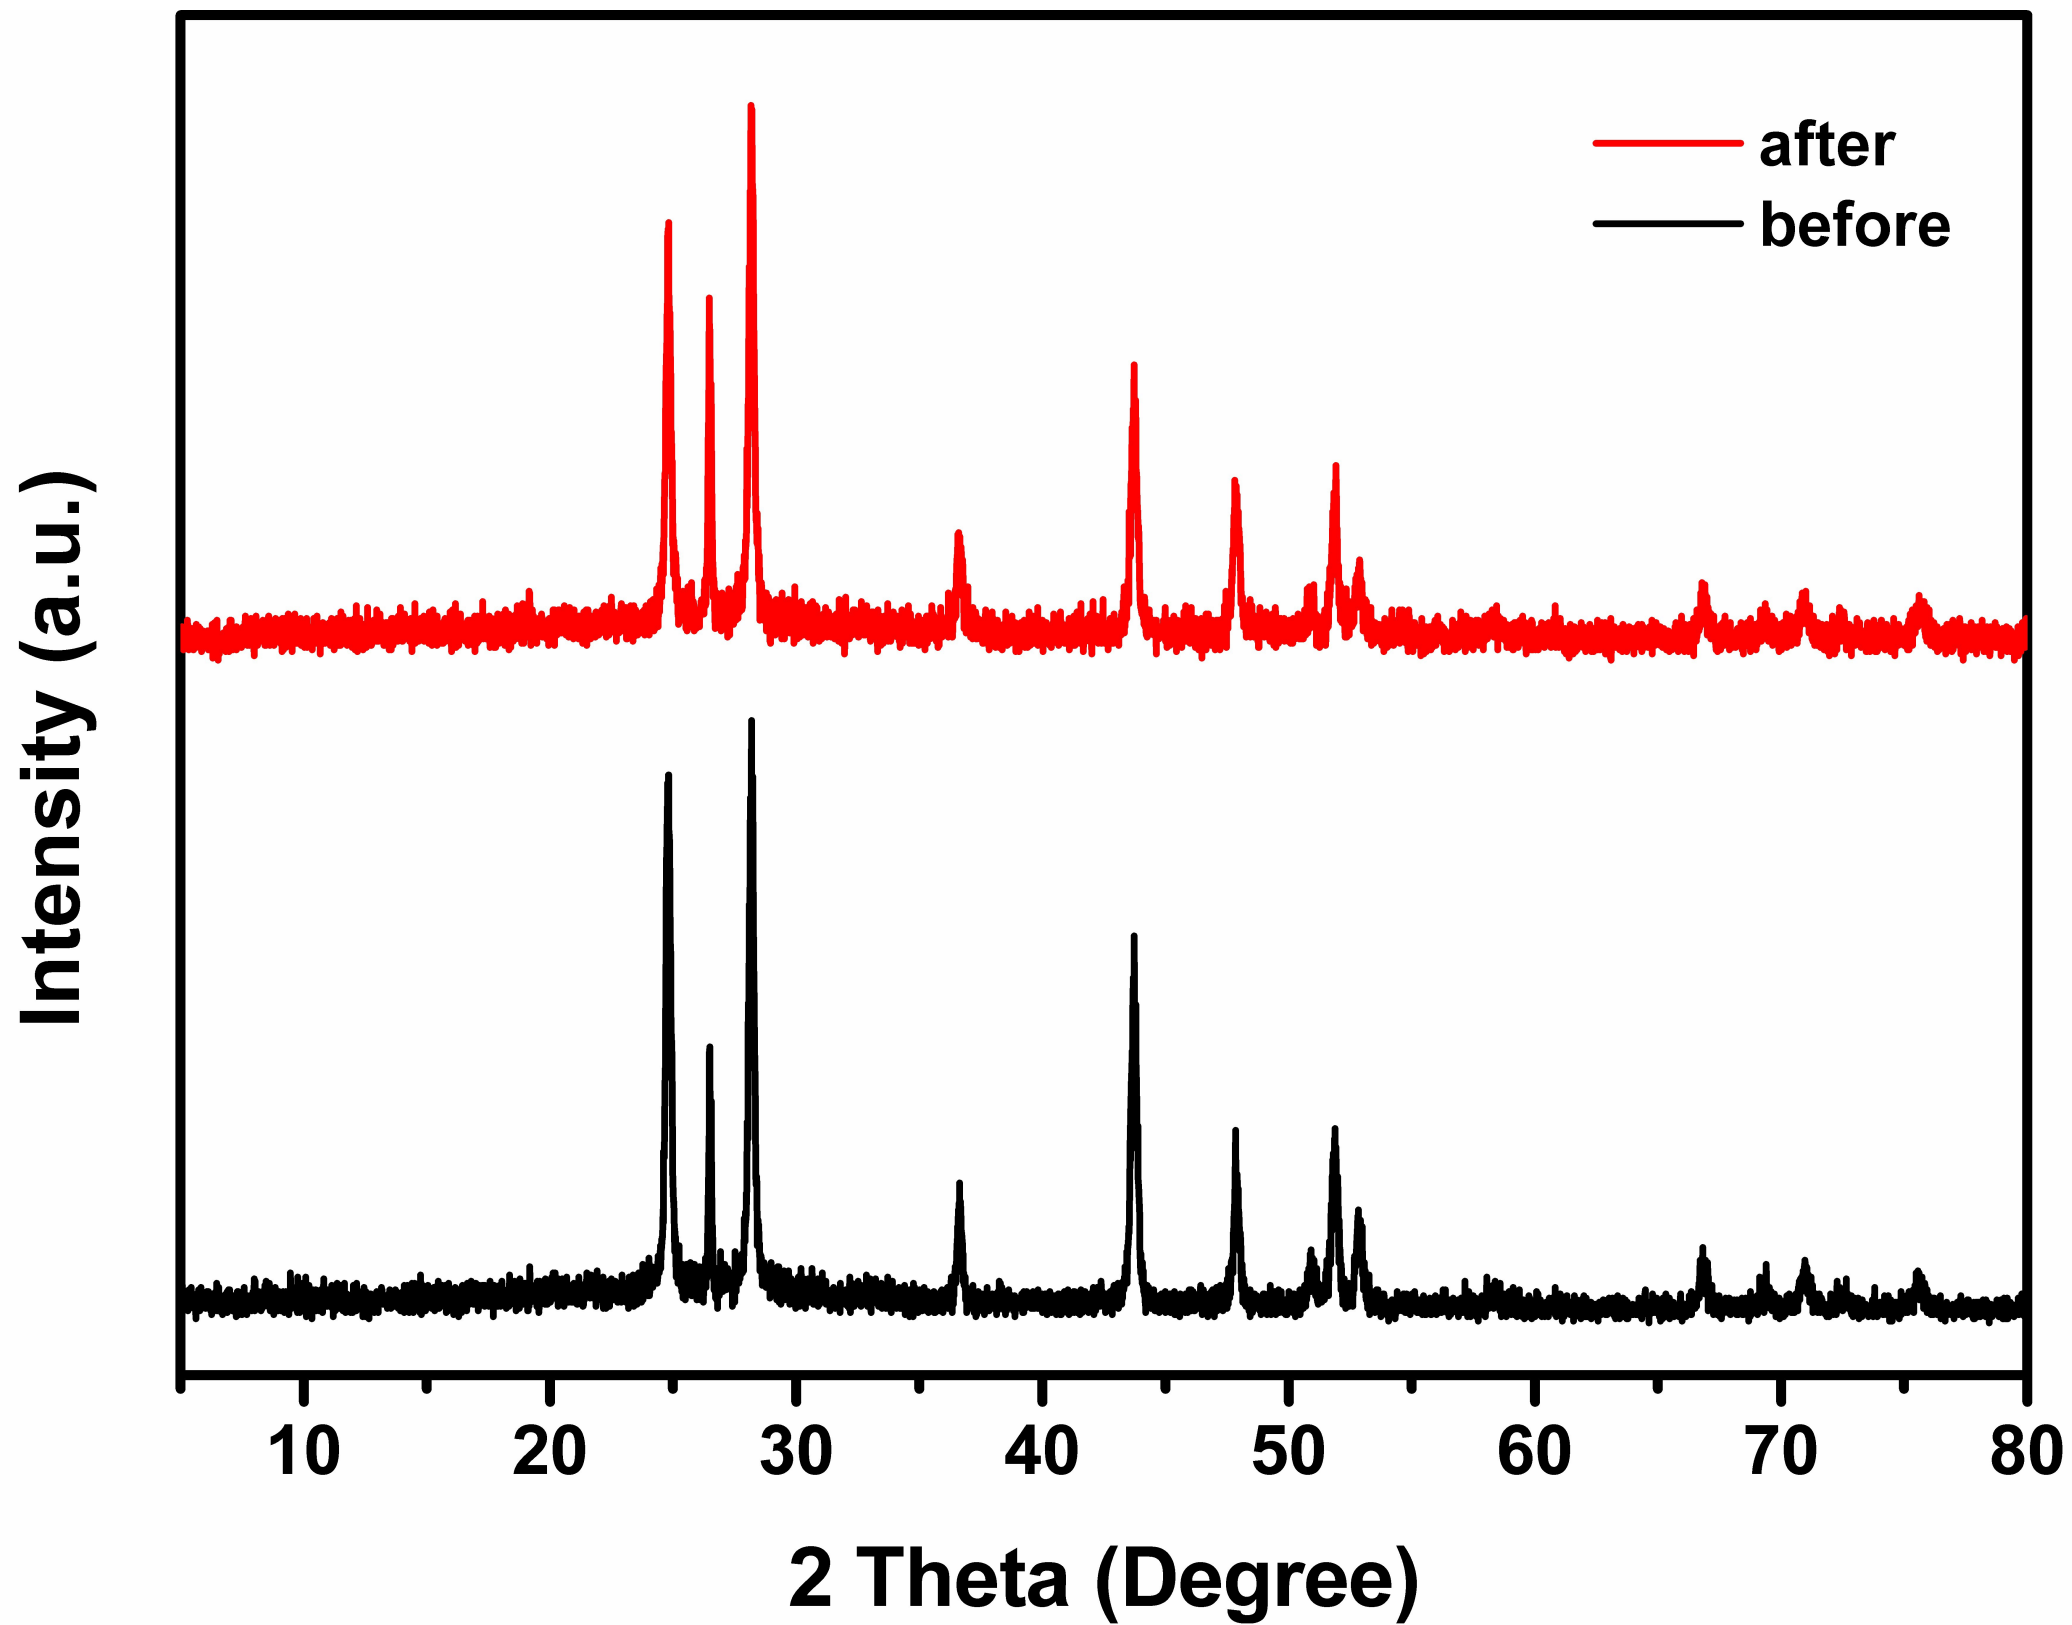

Supplement: d0nj04335d6.pdf [file d0nj04335d6.pdf]

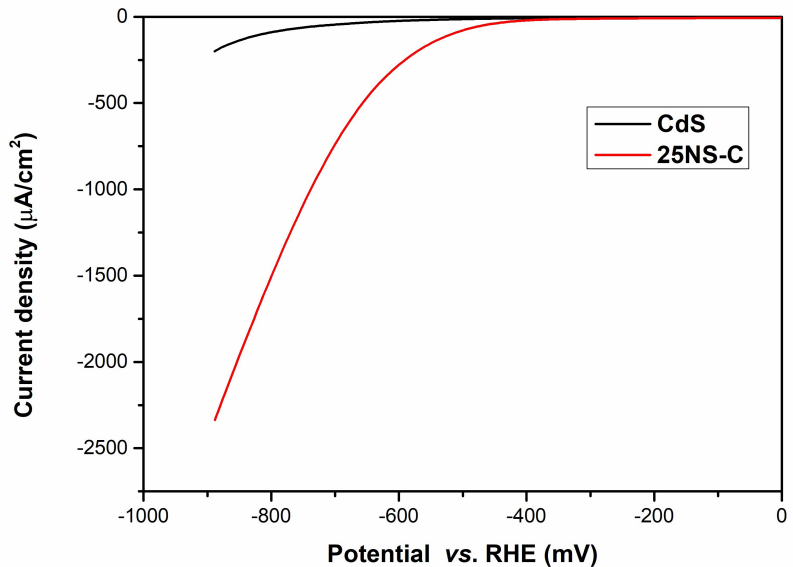

Supplement: d0nj04335d7.pdf [file d0nj04335d7.pdf]

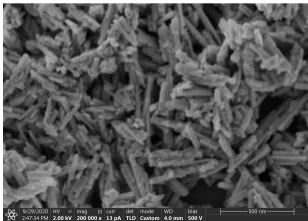

Supplement: d0nj04335d8.pdf [file d0nj04335d8.pdf]
